# Supplementary material for: The Expansion of the Spectrum in Stuttering Disorders to a Novel ARMC Gene Family (ARMC3)
Source: MDPI journal article supplement (doi:10.3390/genes13122299), 2022-12-06
Supplement: s1 [file s1]

## Supplementary Materials

**Table S1.** *In silico* interpretations of ARMC3, BCHE and CACNA1F variants.

| Gene                                                        | Variant                | S. No. | Pathogenicity Prediction Tools | Scores   | Prediction status                | ACMG 2015                                             | Co-segregation |
|-------------------------------------------------------------|------------------------|--------|--------------------------------|----------|----------------------------------|-------------------------------------------------------|----------------|
| ARMC3                                                       | c.916+1G>A             | 1      | MutationTaster                 | 1        | Disease causing                  | Pathogenic of Uncertain Significance (PVS1, PP3, BS1) | Yes            |
|                                                             |                        | 2      | PolyPhen-2                     | NA       | NA                               |                                                       |                |
|                                                             |                        | 3      | SIFT                           | NA       | NA                               |                                                       |                |
|                                                             |                        | 4      | PROVEAN                        | NA       | NA                               |                                                       |                |
|                                                             |                        | 5      | VarSome                        | 5/6      | Pathogenic                       |                                                       |                |
|                                                             |                        | 6      | CADD                           | 28.8     | Deleterious                      |                                                       |                |
|                                                             |                        | 7      | VarSEAK                        | 13.81%   | Splicing Effect                  |                                                       |                |
|                                                             |                        | 8      | RegSNP-Intron                  | 0.82     | Damaging                         |                                                       |                |
|                                                             |                        | 9      | Human Splice Finder            | -137.71% | Most probably affecting splicing |                                                       |                |
|                                                             |                        | 10     | MaxEntScan                     | -----    | Likely disruptive                |                                                       |                |
|                                                             |                        | 11     | FATHMM-MKL                     | 0.9567   | Pathogenic                       |                                                       |                |
|                                                             |                        | 12     | EIGEN                          | 0.8194   | Pathogenic                       |                                                       |                |
|                                                             |                        | 13     | EIGEN PC                       | 0.5837   | Pathogenic                       |                                                       |                |
|                                                             |                        | 14     | BayesDel noAF                  | -0.0014  | Pathogenic                       |                                                       |                |
|                                                             |                        | 15     | PhyloP100way                   | 5.724    | Highly conserved                 |                                                       |                |
|                                                             |                        | 16     | GERP                           | 5.7699   | Conserved,                       |                                                       |                |
| BCHE                                                        | c.293A>G; p.Asp98Gly   | 1      | MutationTaster                 | 0.9999   | Disease causing                  | Pathogenic (PP5, PS3, PM5, BP4)                       | No             |
|                                                             |                        | 2      | PolyPhen-2                     | 0.852    | Possibly damaging                |                                                       |                |
|                                                             |                        | 3      | SIFT                           | 0.05     | Pathogenic                       |                                                       |                |
|                                                             |                        | 4      | PROVEAN                        | 5.56     | Pathogenic                       |                                                       |                |
|                                                             |                        | 5      | VarSome                        | 14/17    | Pathogenic                       |                                                       |                |
|                                                             |                        | 6      | CADD                           | 23.7     | Deleterious                      |                                                       |                |
|                                                             |                        | 7      | VarSEAK                        | NA       | NA                               |                                                       |                |
|                                                             |                        | 8      | RegSNP-Intron                  | NA       | NA                               |                                                       |                |
|                                                             |                        | 9      | Human Splice Finder            | NA       | NA                               |                                                       |                |
|                                                             |                        | 10     | MaxEntScan                     | NA       | NA                               |                                                       |                |
|                                                             |                        | 11     | FATHMM-MKL                     | 0.98567  | Pathogenic                       |                                                       |                |
|                                                             |                        | 12     | EIGEN                          | 0.3421   | Uncertain                        |                                                       |                |
|                                                             |                        | 13     | EIGEN PC                       | 0.3432   | Uncertain                        |                                                       |                |
|                                                             |                        | 14     | BayesDel noAF                  | 0.2349   | Pathogenic                       |                                                       |                |
|                                                             |                        | 15     | PhyloP100way                   | 7.226    | Highly conserved                 |                                                       |                |
|                                                             |                        | 16     | GERP                           | -----    | Conserved                        |                                                       |                |
| CACNA1F                                                     | c.1555G>A; p.Gly519Ser | 1      | MutationTaster                 | 0.99951  | Disease causing                  | NPF                                                   | No             |
|                                                             |                        | 2      | PolyPhen-2                     | 0.999    | Probably damaging                |                                                       |                |
|                                                             |                        | 3      | SIFT                           | 0.01     | Damaging                         |                                                       |                |
|                                                             |                        | 4      | PROVEAN                        | NPF      | NPF                              |                                                       |                |
|                                                             |                        | 5      | VarSome                        | NPF      | NPF                              |                                                       |                |
|                                                             |                        | 6      | CADD                           | 24.3     | Deleterious                      |                                                       |                |
|                                                             |                        | 7      | VarSEAK                        | NA       | NA                               |                                                       |                |
|                                                             |                        | 8      | RegSNP-Intron                  | NA       | NA                               |                                                       |                |
|                                                             |                        | 9      | Human Splice Finder            | NA       | NA                               |                                                       |                |
|                                                             |                        | 10     | MaxEntScan                     | NA       | NA                               |                                                       |                |
|                                                             |                        | 11     | FATHMM-MKL                     | NPF      | NPF                              |                                                       |                |
|                                                             |                        | 12     | EIGEN                          | NPF      | NPF                              |                                                       |                |
|                                                             |                        | 13     | EIGEN PC                       | NPF      | NPF                              |                                                       |                |
|                                                             |                        | 14     | BayesDel noAF                  | NPF      | NPF                              |                                                       |                |
|                                                             |                        | 15     | PhyloP100way                   | 7.819    | Highly conserved                 |                                                       |                |
|                                                             |                        | 16     | GERP                           | -----    | Conserved                        |                                                       |                |
| Abbreviations: NA: Not applicable. NPF: No prediction found |                        |        |                                |          |                                  |                                                       |                |

**Table S2.** The identified variants causing persistent developing stuttering in the previous and present studies.

| Gene                                                                               | OMIM   | Chr. | Cytogenic location | cDNA change       | Amino acid change | Exon                          | dbSNP        | Variant type | Mutation type | Familial/Sporadic | Origin      | References    |
|------------------------------------------------------------------------------------|--------|------|--------------------|-------------------|-------------------|-------------------------------|--------------|--------------|---------------|-------------------|-------------|---------------|
| GNPTAB                                                                             | 607840 | 12   | q23.2              | c.961A>G          | p.Ser321Gly       | 9                             | rs137853824  | SNV          | Missense      | Familial          | Pakistani   | [17]          |
|                                                                                    |        |      |                    | c.1363G>T         | p.Ala455Ser       | 11                            | rs137853822  |              |               |                   |             |               |
|                                                                                    |        |      |                    | c.1875C>G         | p.Phe624Leu       | 13                            | rs137853823  |              |               |                   |             |               |
|                                                                                    |        |      |                    | c.3598G>A         | p.Glu1200Lys      | 19                            | rs137853825  |              |               |                   |             |               |
| GNPTG                                                                              | 607838 | 16   | p13.3              | c.11_19dup        | p.Leu5_Arg7dup    | 1                             | rs1195696340 | Duplication  | Duplication   | Familial          | Pakistani   | [17]          |
|                                                                                    |        |      |                    | c.74C>A           | p.Ala25Glu        | 2                             | rs137853826  | SNV          | Missense      |                   |             |               |
|                                                                                    |        |      |                    | c.688C>G          | p.Leu230Val       | 9                             | rs137853827  |              |               |                   |             |               |
| NAGPA                                                                              | 607985 | 16   | p13.3              | c.252C>G          | p.His84Gln        | 2                             | rs755458782  | SNV          | Missense      | Familial          | Pakistani   | [17]          |
|                                                                                    |        |      |                    | c.982C>T          | p.Arg328Cys       | 6                             | rs139526942  |              |               |                   |             |               |
|                                                                                    |        |      |                    | c.1538_1553del    | p.Phe513Serfs*113 | 10                            | NA           | Deletion     | Frameshift    |                   |             |               |
| AP4E1                                                                              | 607244 | 15   | q21.2              | c.1549G>A         | p.Val517Ile       | 14                            | rs760021635  | SNV          | Missense      | Familial          | Cameroonian | [18]          |
|                                                                                    |        |      |                    | c.2401G>A         | p.Glu801Lys       | 18                            | rs556450190  |              |               |                   |             |               |
| IFNAR1                                                                             | 107450 | 21   | q22.11             | c.1282A>C         | p.Lys428Gln       | 9                             | rs563741878  | SNV          | Missense      | Familial          | Chinese     | [13]          |
|                                                                                    |        |      |                    | c.1655T>C         | Leu552Pro         | 11                            | rs762410025  |              |               | Familial          | Chinese     |               |
|                                                                                    |        |      |                    | c.902G>A          | p.Gly301Glu       | 7                             | rs375386475  |              |               | Sporadic          | Chinese     |               |
|                                                                                    |        |      |                    | c.1002_1004delTCC | p.Pro335del       | 8                             | rs72552343   | Deletion     | Deletion      | Sporadic          | Chinese     |               |
| ARMC3                                                                              | 611226 | 10   | p12.2              | c.916+1G>A        | NA                | Splice donor site of intron-8 | rs767509621  | SNV          | Splice site   | Familial          | Pakistani   | Present study |
| Abbreviations: Chr; Chromosome, SNV; Single nucleotide variant, NA; Not applicable |        |      |                    |                   |                   |                               |              |              |               |                   |             |               |
